# Supplementary material for: Milk clotting and blood wash potential of acidic serine protease purified from Ocimum basilicum (sweet basil) seeds
Source: Research Square preprint supplement (doi:10.21203/rs.3.rs-8782507/v1), 2026-02-13
Supplement: Supplementary file 1 [file 9d394a86cafecef5e2fa8d14.docx]

*
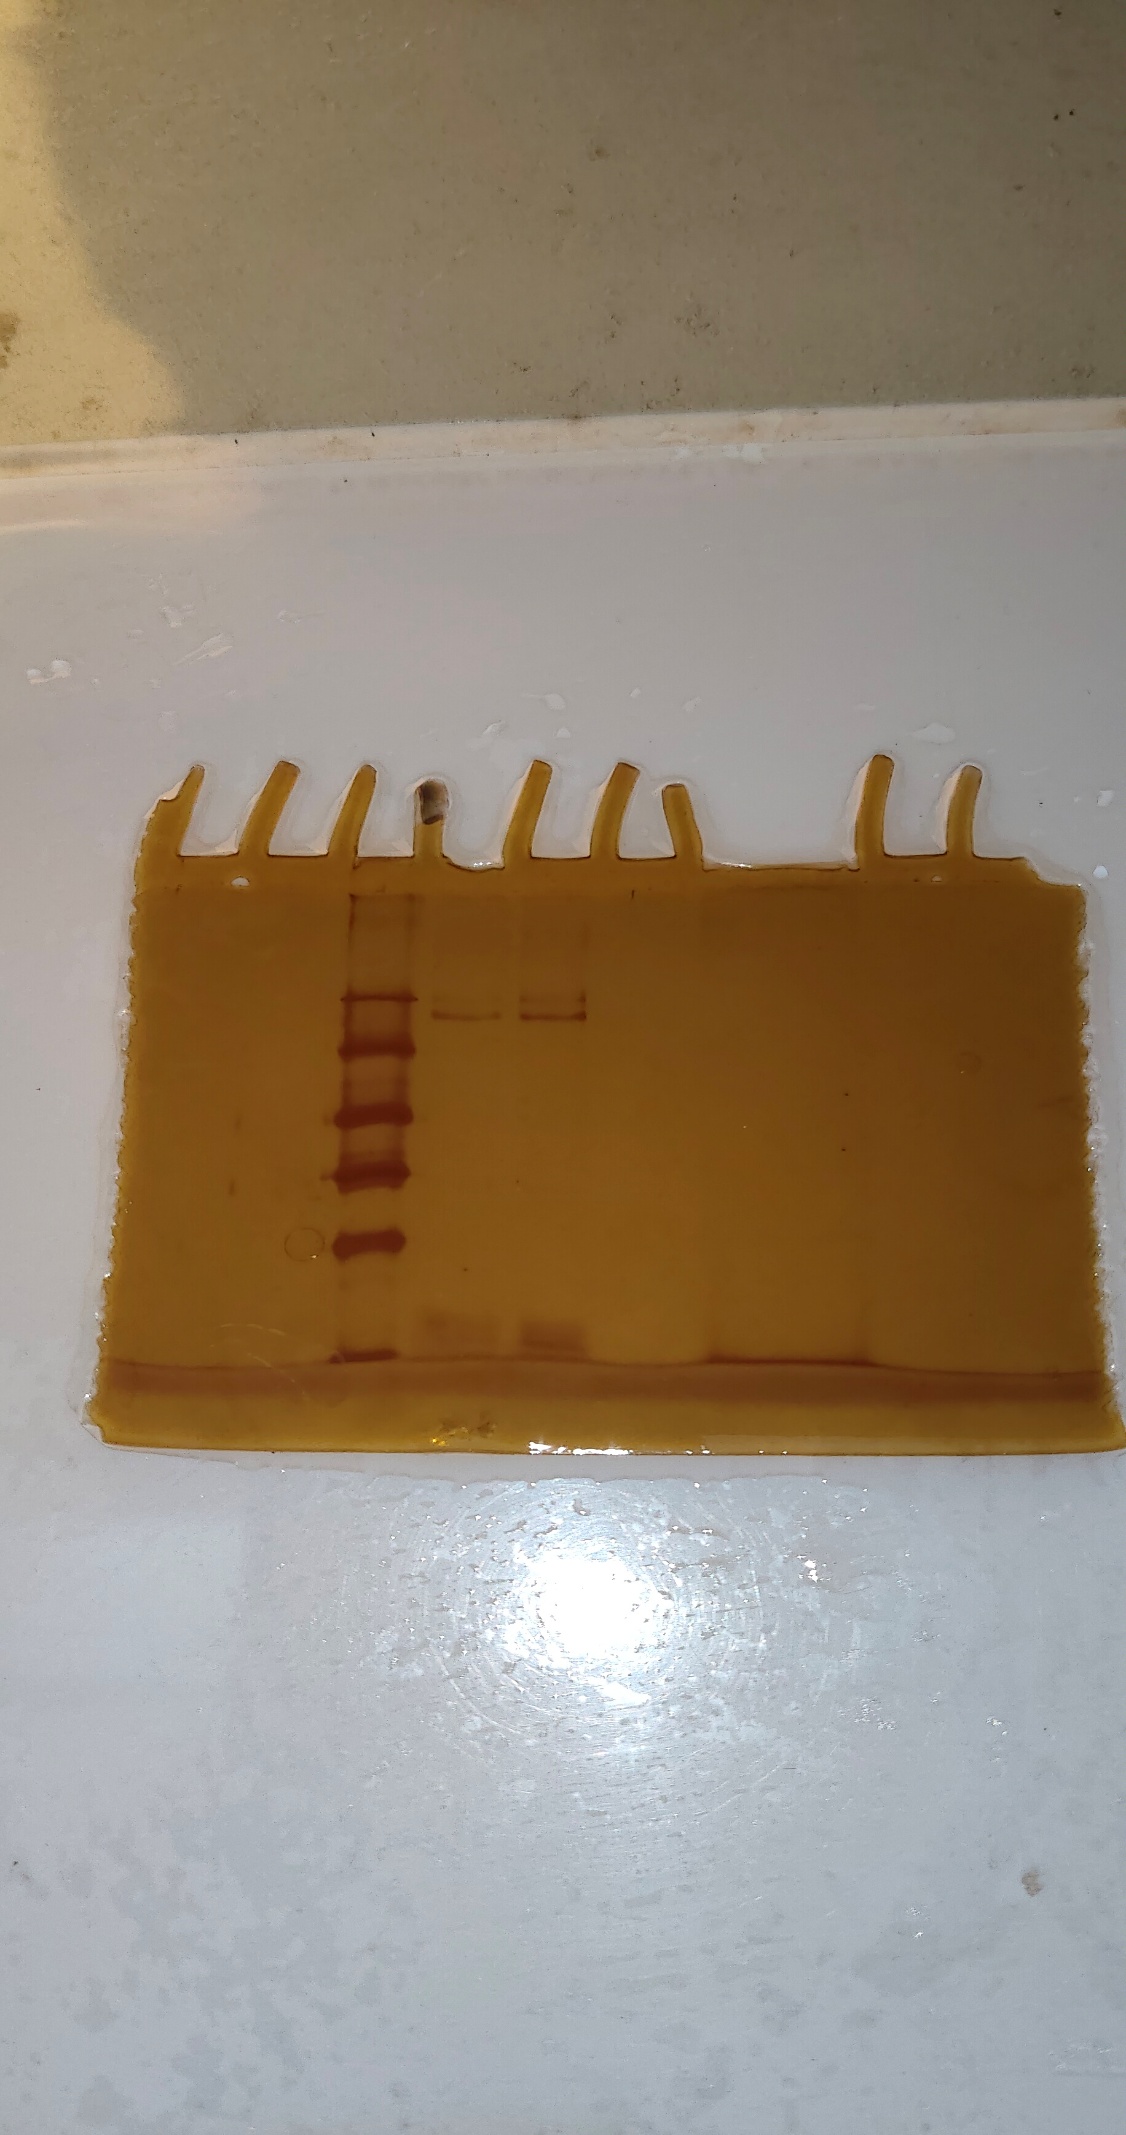
*

**d**

**c**

**b**

**a**

Figure 1 SDS–PAGE gel (10%) of purified O. basilicum protease; Lane a: Standard molecular-mass markers (kDa); Lane b: DEAE Cellulose column eluted active protease fraction (15-16) in reducing condition was inhibited by serine protease inhibitor 2 mM PMSF; Lane c: DEAE Cellulose column eluted active protease fraction (17) in reducing condition without inhibitor; lane d: DEAE Cellulose column eluted protease fraction (18) in reducing condition without inhibitor.


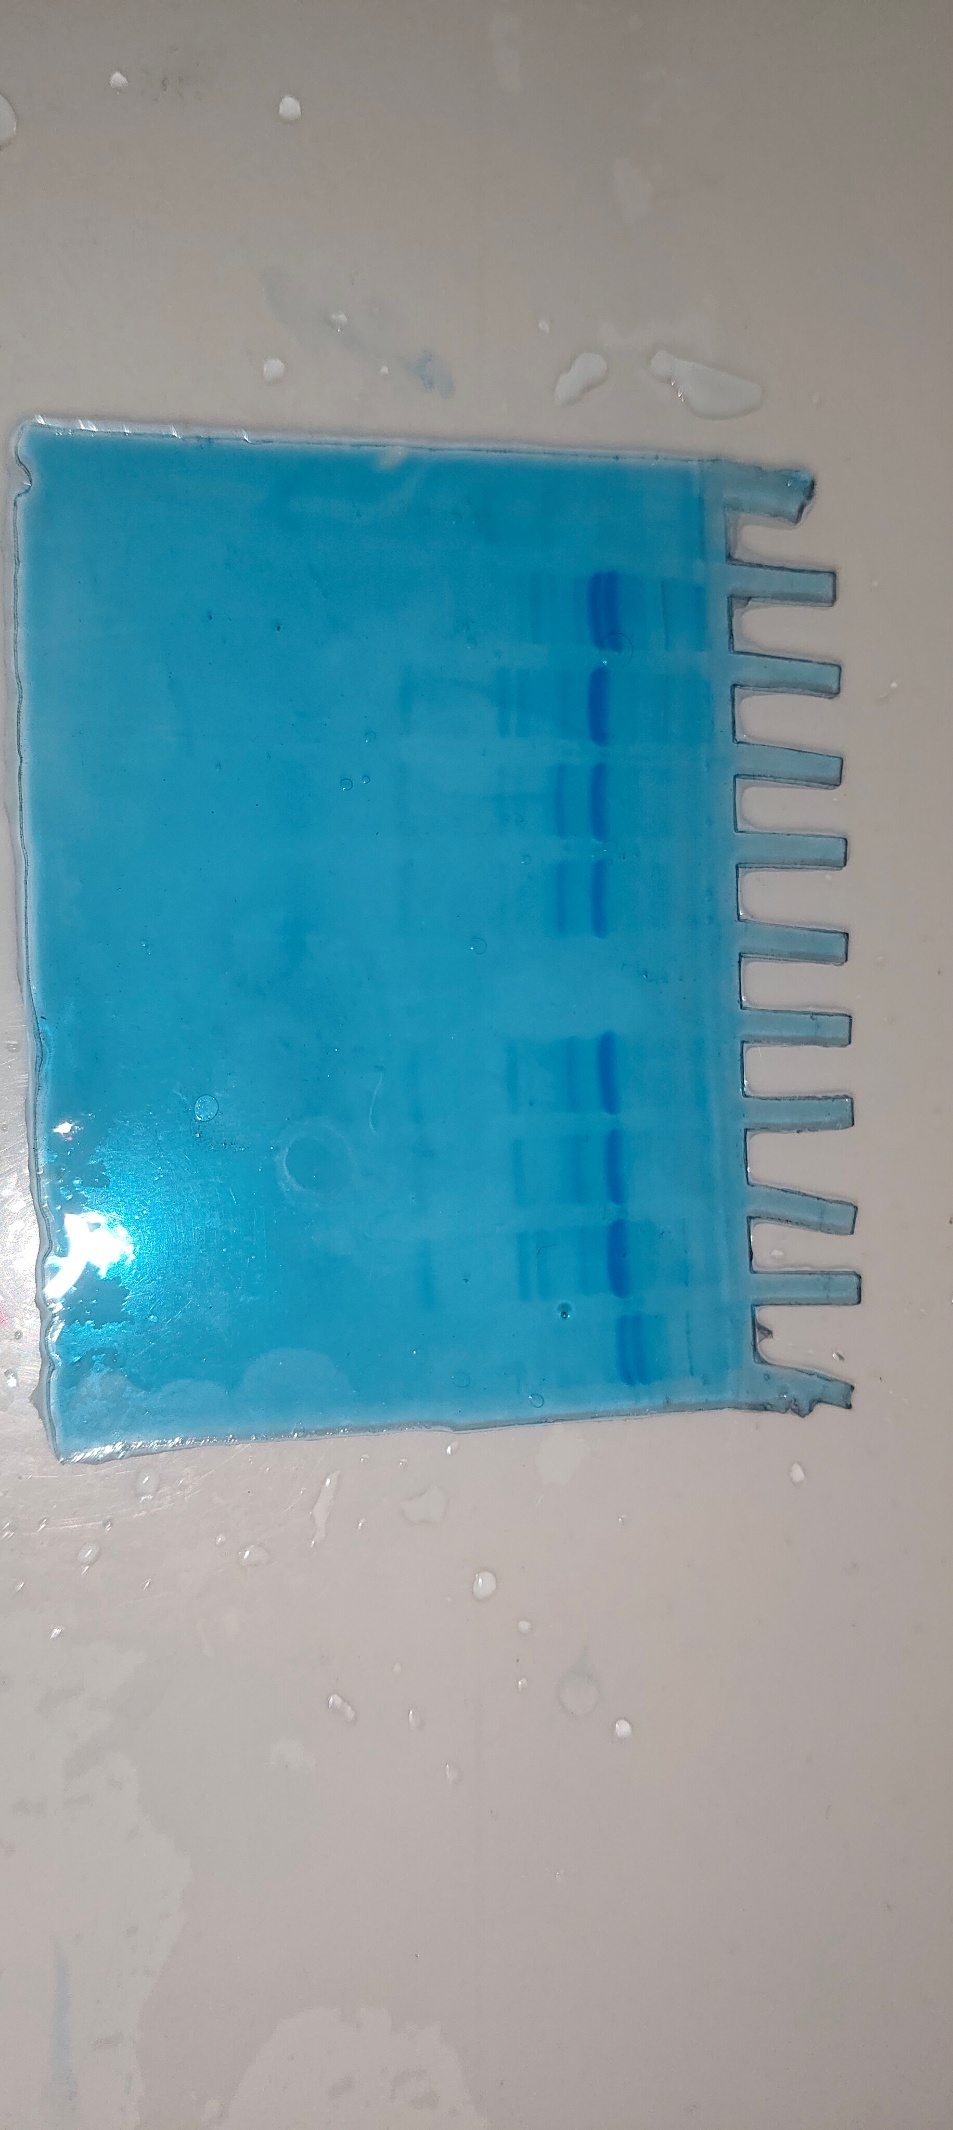


**j**

**i**

**h**

**g**

**f**

**e**

**d**

**c**

**b**

**a**

Figure 2 SDS-PAGE (15%) of fibrinogen cleavage by O. basilicum protease. Lane b&j: Control fibrinogen incubated at -15°C for 24hr and 6 hr respectively, lane c&i: Control fibrinogen incubated at 37°C for 24hr and 6 hr respectively, lane d&h: Fibrinogen (20µg) incubated with protease 20µg at 37°C for 24hr and 6 hr respectively and lane e&g: Fibrinogen (20µg) incubated with protease 10µg at 37°C for 24hr and 6 hr respectively. 40 µl was loaded equally in each well.
